# Supplementary material for: Carbonized propagation synthesis of porous CQDs–SrTiO3/graphene and its photocatalytic performance for removal of methylene blue
Source: Royal Society of Chemistry journal article supplement (doi:10.1039/d1ew00758k), 2022-01-01
Supplement: d1ew00758k1.pdf [file d1ew00758k1.pdf]

### *Supplementary Materials*

#### **Carbonized propagation synthesis of porous CQDs-SrTiO<sub>3</sub>/graphene and its photocatalytic performance for removal of methylene blue**

Juan Cui<sup>1,2</sup>, Jianghui Liu<sup>1</sup>, Xunfeng Xia<sup>2</sup>, Xu Chai<sup>1,2</sup>, Huahua Guo<sup>1</sup>,  
Jianfeng Gao<sup>1\*</sup>, Shengwang Gao<sup>2\*</sup>

1. Shanxi Key Laboratory of advanced carbon based electrode materials, North  
University of China, Taiyuan 030051, China

2. State Key Laboratory of Environmental Criteria and Risk Assessment, Chinese  
Research Academy of Environmental Sciences, Beijing 100012, China.

\* Corresponding Authors

E-mail addresses: jianfenggao@163.com (J. Gao), gaosw@craes.org.cn (S. Gao)

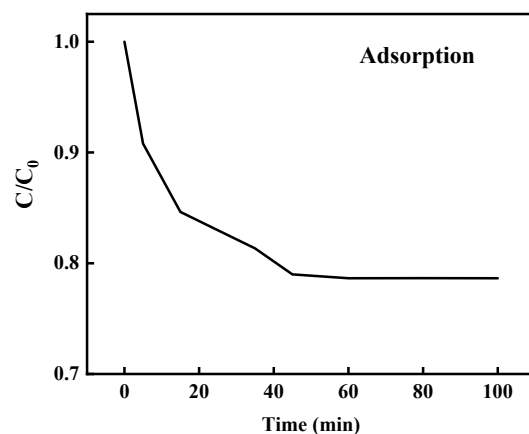

**Fig. S1** The adsorption curve of CSG-5 on MB.

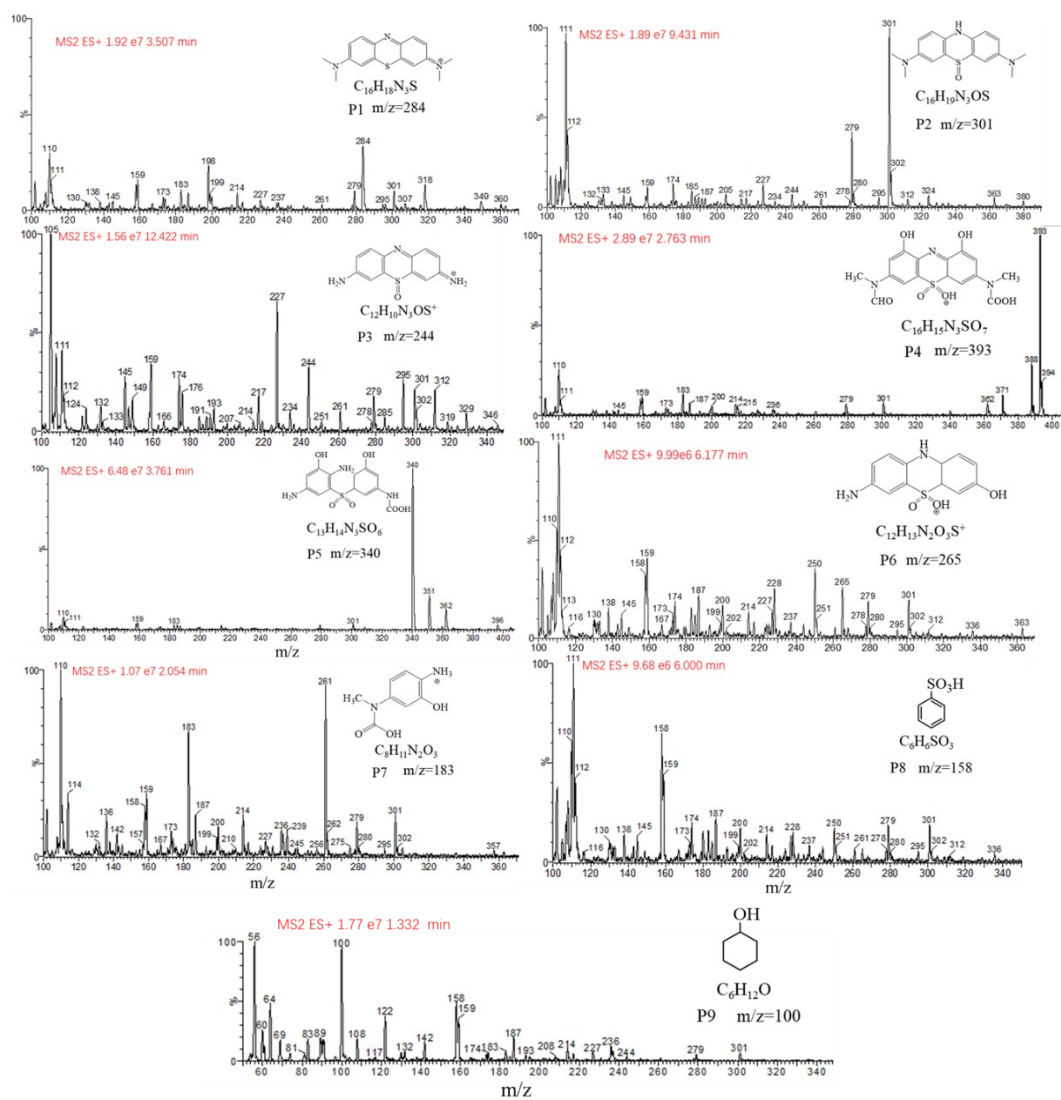

**Fig. S2** Mass spectra of methylene blue (1) and the intermediate products (2-9).

**Table S1** Main fragment ions obtained from MS analyses of MB and its degradation products by CSG-5

| No. | Retention time $t_R$ | m/z | Proposed formula        | Proposed Structure                                                                    |
|-----|----------------------|-----|-------------------------|---------------------------------------------------------------------------------------|
| 1   | 3.507                | 284 | $C_{16}H_{18}N_3S$      | 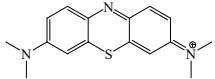   |
| 2   | 9.431                | 301 | $C_{16}H_{19}N_3OS$     |    |
| 3   | 12.422               | 244 | $C_{12}H_{10}N_3OS^+$   |    |
| 4   | 2.763                | 393 | $C_{16}H_{15}N_3SO_7$   |    |
| 5   | 3.761                | 340 | $C_{13}H_{14}N_3SO_6$   |   |
| 6   | 6.177                | 265 | $C_{12}H_{13}N_2O_3S^+$ |  |
| 7   | 2.054                | 183 | $C_8H_{11}N_2O_3$       |  |
| 8   | 6.000                | 158 | $C_6H_6SO_3$            |  |
| 9   | 1.332                | 100 | $C_6H_{11}O$            |  |
